# Supplementary material for: Genome editing in maize directed by CRISPR–Cas9 ribonucleoprotein complexes
Source: PubMed Central journal article supplement (PMC5116081; doi:10.1038/ncomms13274), 2016-11-16
Supplement: ncomms13274-s1.pdf [file ncomms13274-s1.pdf]

1 **Supplementary Table 1.** List of primers used in deep sequencing analysis study on  
 2 embryo tissue.

| Target Site       | Primer Orientation | Primary PCR Primer Sequence with deep sequencing indexes on forward primer where N represents the index sequence |
|-------------------|--------------------|------------------------------------------------------------------------------------------------------------------|
| LIG               | Forward            | CTACACTCTTTCCCTACACGACGCTCTTCCGATCTNNNNCGCAAATGAGTAGCAGCGCAC                                                     |
|                   | Reverse            | CAAGCAGAAGACGGCATAACGAGCTCTTCCGATCTCACCTGCTGGGAATTGTACCGTA                                                       |
| MS26              | Forward            | CTACACTCTTTCCCTACACGACGCTCTTCCGATCTNNNNNTCCTGGAGGACGACGTGCTG                                                     |
|                   | Reverse            | CAAGCAGAAGACGGCATAACGAGCTCTTCCGATCTCCGGAAGCTCGCCGCGT                                                             |
| MS45              | Forward            | CTACACTCTTTCCCTACACGACGCTCTTCCGATCTNNNNNGGACCCGTTCCGGCCTCAGT                                                     |
|                   | Reverse            | CAAGCAGAAGACGGCATAACGAGCTCTTCCGATCTGCCGGCTGGCATTGTCTCTG                                                          |
| ALS2              | Forward            | CTACACTCTTTCCCTACACGACGCTCTTCCGATCTNNNNGTCTGCATCGCCACCTCCGG                                                      |
|                   | Reverse            | CTACACTCTTTCCCTACACGACGCTCTTCCGATCTTCCGTCTGCATCGCCACCTCCGG                                                       |
|                   |                    |                                                                                                                  |
| Target Site       | Primer Orientation | Secondary PCR Primer Sequence                                                                                    |
| Universal Primers | Forward            | AATGATACGGCGACCACCGAGATCTACACTCTTTCCCTACACG                                                                      |
|                   | Reverse            | CAAGCAGAAGACGGCATA                                                                                               |

3  
 4  
 5 **Supplementary Table 2.** List of primers used in deep sequencing analysis study on  
 6 plant tissue.

| Target Site       | Primer Orientation | Primary PCR Primer Sequence                                                                                            |
|-------------------|--------------------|------------------------------------------------------------------------------------------------------------------------|
| LIG               | Forward            | ATCGGGAAGCTGAAGCACCTGCTGGGAATTGTACCGTA                                                                                 |
|                   | Reverse            | ATCCGACGGTAGTGTGCGCAAATGAGTAGCAGCGCAC                                                                                  |
| MS26              | Forward            | ATCGGGAAGCTGAAGTCCTGGAGGACGACGTGCTG                                                                                    |
|                   | Reverse            | ATCCGACGGTAGTGTCCGGAAGCTCGCCGCGT                                                                                       |
| MS45              | Forward            | ATCGGGAAGCTGAAGGGACCCGTTCCGGCCTCAGT                                                                                    |
|                   | Reverse            | ATCCGACGGTAGTGTGCCGGCTGGCATTGTCTCTG                                                                                    |
| ALS2              | Forward            | ATCCGACGGTAGTGTGTCTGCATCGCCACCTCCGG                                                                                    |
|                   | Reverse            | ATCGGGAAGCTGAAGCTCCTGGAAGGCGTCCGGTGC                                                                                   |
| MS45 off-site     | Forward            | ATCGGGAAGCTGAAGGAAGTACCCGCCGGACG                                                                                       |
|                   | Reverse            | GCCAATTGTGCTATAATTTGTCACCTA                                                                                            |
|                   |                    |                                                                                                                        |
| Target Site       | Primer Orientation | Secondary PCR Primer Sequence with deep sequencing indexes on the reverse primer where N represents the index sequence |
| Universal Primers | Forward            | AATGATACGGCGACCACCGAGATCTACACATACGAGATCCGTAATCGGGAAGCTGAAG                                                             |
|                   | Reverse            | CAAGCAGAAGACGGCATAACGAGATNNNNNNNNACACGCACGATCCGACGGTAGTGT                                                              |

7  
 8

9 **Supplementary Note 1. Maize Optimized Cas9**

10 ATGGCACCGAAGAAGAAGCGCAAGGTGATGGACAAGAAGTACAGCATCGGCCTCGACATCGGCACCAACTCGGTGGG  
11 CTGGGCCGTGTCATCACGGACGAATATAAGGTCCCGTCAAGAAGTTCAAGGTCCTCGGCAATACAGACCGCCACAGCA  
12 TCAAGAAAACTTGATCGGCGCCCTCCTGTTGATAGCGGCGAGACCGCGGAGGCGACCAGGCTCAAGAGGACCGCC  
13 AGGAGACGGTACTACTAGGCGCAAGAACAGGATCTGCTACCTGCAGGAGATCTTCAAGCAACGAGATGGCGAAGGTGGA  
14 CGACTCCTTCTTCCACCGCTGGAGGAATCATTCTGTTGGAGGAGGACAAGAAGCATGAGCGGCACCCAATCTTCCG  
15 GCAACATCGTTCGACGAGGTAAGTTTCTGCTTCTACCTTTGATATATATATAATAATTATCATTAAATTAGTAGTAATA  
16 TAATATTTCAAATATTTTTTTTCAAATAAAAAGAATGTAGTATATAGCAATTGCTTTTTCTGTAGTTTATAAGTGTGTA  
17 TATTTTAATTTATAACTTTTTCTAATATATGACCAAAACATGGTGATGTGCAGGTGGCCTACCACGAGAAGTACCCGA  
18 CAATCTACCACCTCCGGAAGAACTGGTGGACAGCACAGACAAGGCGGACCTCCGGCTCATCTACCTTGCCCTCGCG  
19 CATATGATCAAGTTCGCGGCCACTTCTCATCGAGGGCGACCTGAACCCGGACAACCTCCGACGTGGACAAGCTGTT  
20 CATCCAGCTCGTGCAGACGTACAATCAACTGTTTCGAGGAGAACCCCATAAACGCTAGCGGCGTGGACGCCAAGGCCA  
21 TCCTCTCGGCCAGGCTCTCGAAATCAAGAAGGCTGGAGAACCTTATCGCGCAGTTGCCAGGCGAAAAGAAGAAGCGC  
22 CTCTTCGGCAACCTTATTGCGCTCAGCCTCGGCCTGACGCCGAACTTCAAATCAAACCTTCGACCTCGCGGAGGACGC  
23 CAAGCTCCAGCTCTCAAAGGACACCTACGACGACGACCTCGACAACCTCCTGGCCCAGATAGGAGACCAGTACGCGG  
24 ACCTCTTCCTCGCCGCAAGAACCTCTCCGACGCTATCCTGCTCAGCGACATCCTTCGGGTCAACACCGAAATTACC  
25 AAGGCACCGCTGTCCGCCAGCATGATTAAACGCTACGACGAGCACCATCAGGACCTCACGCTGCTCAAGGCACCTCGT  
26 CCGCCAGCAGCTCCCCGAGAAGTACAAGGAGATCTTCTTCGACCAATCAAAAAACGGCTACGCGGGATATATCGACG  
27 GCGGTGCCAGCCAGGAAGAGTTCTACAAGTTCATCAAACCAATCCTGGAGAAGATGGACGGCACCGAGGAGTTGCTG  
28 GTCAAGCTCAACAGGGAGGACCTCCTCAGGAAGCAGAGGACCTTCGACAACGGCTCCATCCCGCATCAGATCCACCT  
29 GGGCGAACTGCATGCCATCCTGCGGCGCCAGGAGGACTTCTACCCGTTCTGAAGGATAACCGGGAGAAGATCGAGA  
30 AGATCTTGACGTTCCGCATCCATACTACGTGGGCCCGCTGGCTCGCGGCAACTCCCGGTTGCGCTGGATGACCCGG  
31 AAGTCGGAGGAGACCATCACACCCTGGAACCTTTGAGGAGGTGGTTCGATAAAGGGCGCTAGCGCTCAGAGCTTCATCGA  
32 GCGCATGACCAACTTCGATAAAAACCTGCCAATGAAAAAGTCTCCCAAGCACTCGCTGCTCTACGAGTACTTCA  
33 CCGTGTACAACGAGCTCACCAGGTCAAATACGTACCCGAGGGCATGCGGAAGCCGGCGTTCTGAGCGGCGAGCAG  
34 AAGAAGGCGATAGTGGACCTCCTCTTCAAGACCAACAGGAAGGTGACCGTGAAGCAATTAAGAGGACTACTTCAA  
35 GAAAATAGAGTGCTTCGACTCCGTGGAGATCTCGGGCGTGGAGGATCGGTTCAACGCCTCACTCGGCACGTATCACG  
36 ACCTCCTCAAGATCATTAAAGACAAGGACTTCTCGACAACGAGGAGAACGAGGACATCCTCGAGGACATCGTCCTC  
37 ACCCTGACCCTGTTTCGAGGACCGCGAAATGATCGAGGAGAGGCTGAAGACCTACGCGCACCTGTTTCGACGACAAGGT  
38 CATGAAACAGCTCAAGAGGCGCCGCTACTGTTGGGGAAGGCTGTCCCGCAAGCTCATTAAATGGCATCAGGGACA  
39 AGCAGAGCGGCAAGACCATCCTGGACTTCTCAAGTCCGACGGGTTCCGCAACCGCAACTTCATGCAGCTCATTAC  
40 GACGACTCGCTCACGTTCAAGGAAGACATCCAGAAGGCACAGGTGAGCGGGCAGGGTGACTCCCTCCACGAACACAT  
41 CGCCAACCTGGCCGGCTCGCCGGCCATTAAAAAGGGCATCCTGCAGACGGTCAAGGTCGTTCGACGAGCTCGTGAAGG  
42 TGATGGGCCGGCACAAGCCCAGAAATATCGTCATAGAGATGGCCAGGAGAACAGACCACCCAAAAAGGGCAGAAG  
43 AACTCGCGGAGCGGATGAAACGGATCGAGGAGGGCATTAAAGAGCTCGGGTCCAGATCCTGAAGGAGCACCCCGT  
44 GGAAAATACCCAGCTCCAGAATGAAAAGCTCTACCTCTACTACCTGCAGAACGGCCGCGACATGTACGTGGACCAGG  
45 AGCTGGACATTAATCGGCTATCGGACTACGACGTGACCACATCGTGCCGCGAGTCGTTCTCAAGGACGATAGCATC

46 GACAACAAGGTGCTCACCCGGTCCGATAAAAAATCGGGGCAAGAGCGACAACGTGCCAGCGAGGAGGTCTGTGAAGAA  
47 GATGAAAAACTACTGGCGCCAGCTCCTCAACGCGAAACTGATCACCCAGCGCAAGTTCGACAACCTGACGAAGGCGG  
48 AACGCGGTGGCTTGAGCGAACTCGATAAGGCGGGCTTCATAAAAAGGCAGCTGGTTCGAGACGCGCCAGATCACGAAG  
49 CATGTCGCCAGATCCTGGACAGCCGCATGAATACTAAGTACGATGAAAACGACAAGCTGATCCGGGAGGTGAAGGT  
50 GATCACGCTGAAGTCCAAGCTCGTGTCCGACTTCCGCAAGGACTTCCAGTCTACAAGGTCCGCGAGATCAACAAC  
51 ACCACCAGCCCACGACGCCTACCTGAATGCGGTGGTCCGGACCGCCCTGATCAAGAAGTACCCGAAGCTGGAGTCC  
52 GAGTTCGTGTACGGCGACTACAAGGTCTACGACGTGCGCAAAATGATCGCCAAGTCCGAGCAGGAGATCGGCAAGGC  
53 CACGGCAAAATACTTCTTCTACTCGAACATCATGAACTTCTTCAAGACCGAGATCACCTTCGCGAACGGCGAGATCC  
54 GCAAGCGCCCCTCATCGAAACCAACGGCGAGACGGGCGAGATCGTCTGGGATAAGGGCCGGGATTTTCGCGACGGTC  
55 CGCAAGGTGCTCTCCATGCCGCAAGTCAATATCGTGAAAAGACGGAGGTCCAGACGGGCGGGTTCAGCAAGGAGTC  
56 CATCCTCCCGAAGCGCAACTCCGACAAGCTCATCGCGAGGAAGAAGGATTGGGACCCGAAAAATATGGCGGCTTCG  
57 ACAGCCCGACCGTTCGCATACAGCGTCCTCGTGTGGCGAAGGTGGAGAAGGGCAAGTCAAAGAAGCTCAAGTCCGTG  
58 AAGGAGCTGCTCGGGATCACGATTATGGAGCGGTCTCCTTCGAGAAGAACCCGATCGACTTCCTAGAGGCCAAGGG  
59 ATATAAGGAGGTCAAGAAGGACCTGATTATTAAGTCCGAAAGTACTCGCTCTTCGAGCTGGAAAACGGCCGCAAGA  
60 GGATGCTCGCCTCCGCAGGCGAGTTGCAGAAGGGCAACGAGCTCGCCCTCCCGAGCAAATACGTCAATTTCTGTAC  
61 CTCGCTAGCCACTATGAAAAGCTCAAGGGCAGCCCGGAGGACAACGAGCAGAAGCAGCTCTTCGTGGAGCAGCACAA  
62 GCATTACCTGGACGAGATCATCGAGCAGATCAGCGAGTTCTCGAAGCGGGTGATCCTCGCCGACGCGAACCTGGACA  
63 AGGTGCTGTCCGCATATAACAAGCACCGCGACAAACCAATACGCGAGCAGGCCGAAAATATCATCCACCTCTTCACC  
64 CTCACCAACCTCGGCGCTCCGGCAGCCTTCAAGTACTTCGACACCACGATTGACCGGAAGCGGTACACGAGCACGAA  
65 GGAGGTGCTCGATGCGACGCTGATCCACCAGAGCATCACAGGGCTCTATGAAACACGCATCGACCTGAGCCAGCTGG  
66 GCGGAGACAAGAGACCACGGGACCGCCACGATGGCGAGCTGGGAGGCCGCAAGCGGGCAAGGTAG

67

68 **Supplementary Note 2.** Guide RNA expression cassette. Expression cassette  
69 containing ZmPolIII promoter, LIG target site spacer (underlined), gRNA (red font) and  
70 PolIII terminator.

71 TGAGAGTACAATGATGAACCTAGATTAATCAATGCCAAAGTCTGAAAAATGCACCCTCAGTCTATGATCCAGAAAAT  
72 CAAGATTGCTTGAGGCCCTGTTTCGGTTGTTCCGGATTAGAGCCCCGGATTAATTCCTAGCCGGATTACTTCTCTAAT  
73 TTATATAGATTTTGGATGAGCTGGAATGAATCCTGGCTTATTCCGGTACAACCGAACAGGCCCTGAAGGATACCAGTA  
74 ATCGCTGAGCTAAATTGGCATGCTGTCAGAGTGTGAGTATTGCAGCAAGGTAGTGAGATAACCGGCATCATGGTGCC  
75 AGTTTGATGGCACCATTAGGGTTAGAGATGGTGGCCATGGGCGCATGTCCTGGCCAACTTTGTATGATATATGGCAG  
76 GGTGAATAGGAAAGTAAAATTGTATTGTAAAAAGGGATTTCTTCTGTTTGTAGCGCATGTACAAGGAATGCAAGTT  
77 TTGAGCGAGGGGGCATCAAAGATCTGGCTGTGTTTTCCAGCTGTTTTTGTAGCCCCATCGAATCCTTGACATAATGA  
78 TCCCGCTTAAATAAGCAACCTCGCTTGTATAGTTCCTTGTGCTCTAACACACGATGATGATAAGTCGTAAAATAGTG  
79 GTGTCCAAAGAATTTCCAGGCCAGTTGTAAAAGCTAAAATGCTATTCTGAATTTCTACTAGCAGTAAGTCGTGTTTA  
80 GAAATTATTTTTTTATATACCTTTTTTCTTCTATGTACAGTAGGACACAGTGTGAGCGCCGCGTTGACGGAGAATA  
81 TTTGCAAAAAAGTAAAAGAGAAAGTCATAGCGGCGTATGTGCCAAAAACTTCGTACAGAGAGGGCCATAAGAAACA  
82 TGGCCACGGCCCAATACGAAGCACCGCGACGAAGCCCAAACAGCAGTCCGTAGGTGGAGCAAAGCGCTGGGTAATA  
83 CGCAAACGTTTTGTCCCACCTTGACTAATCACAAGAGTGGAGCGTACCTTATAAACCGAGCCGCAAGCACCGAATTG  
84 CGTACGCGTACGTGTG**GTTTTAGAGCTAGAAATAGCAAGTTAAAATAAGGCTAGTCCGTTATCAACTTGAAAAAGTG**  
85 **GCACCGAGTCGGTGCTTTTTTTTT**

86

87 **Supplementary Note 3. Cas9 protein sequence with 2 NLSs (underlined)**

88 MAPKKRKRKVMDKKYSIGLDIGTNSVGWAVITDEYKVPSKKFKVLGNTDRHSIKKNLIGALLFDSGETAEATRLKRTA  
89 RRRYTRRKNRICYLQEIFSNEMAKVDDSFHRLEESFLVEEDKKHERHPIFGNIVDEVAYHEKYPTIYHLRKKLVDS  
90 TDKADLRLIYLALAHMIKFRGHFLIEGDLNPDNSDVKLFIQLVQTYNQLFEENPINASGVDAKAILSARLSKSRRL  
91 ENLIAQLPGEKKNGLFGNLIASLGLTPNFKSNFDLAEDAKLQLSKDITYDDDLNLLAQIGDQYADLFLAAKNLSDA  
92 ILLSDILRVNTEITKAPLSASMIKRYDEHHQDLTLLKALVRQQLPEKYKEIFFDQSKNGYAGYIDGGASQEEFYKFI  
93 KPILEKMDGTEELLVKLNREDLLRKQRTFDNGSIPHQIHLGELHAILRRQEDFYPFKDNREKIEKILTFRIPYYVG  
94 PLARGNSRFAMTRKSEETITPWNFEVVDKGGASQSFIERMTNFDKNLPNEKVLPKHSLLEYEFTVYNELTKVKYV  
95 TEGMRKPAFLSGEQKKAIVDLLFKTNRKVTVKQLKEDYFKKIECFDSVEISGVEDRFNASLGTYHDLKLIKDKDFL  
96 DNEENEDILEDIVLTLTLFEDREMI EERLKYAHLFDDKVMKQLKRRRYTGWGRLSRKLINGIRDKQSGKTILDFLK  
97 SDGFANRNFMLIHDDSLTFKEDIQKAQVSGQGDSLHEHIANLAGSPAIKKGILQTVKVVDELVKVMGRHKPENIVI  
98 EMARENQTTQKGQKNSRERMKRIEEGIKELGSQILKEHPVENTQLQNEKLYLYLQNGRDMYVDQELDINRLSDYDV  
99 DHIVPQSFLKDDSIDNKVLTRSDKNRGKSDNVPSEEVVKKMKNYWRQLLNAKLITQRKFDNLTKAERGGLSELDKAG  
100 FIKRQLVETRQITKHVAQILDSRMNTKYDENDKLIREVKVITLKSCLVSDFRKDFQFYKVVREINNYHHAHDAYLNAV  
101 VGTALIKKYPKLESEFVYGDYKVYDVRKMIAKSEQEIGKATAKYFFYSNIMNFFKTEITLANGEIRKRPLIETNGET  
102 GEIVWDKGRDFATVRKVL SMPQVNI VKKTEVQTGGFSKESILPKRNSDKLIARKKDWDPKKYGGFDSPTVAYSVLV  
103 AKVEKGSKKLKSVKELLGITIMERSSEFEKNPIDFLEAKGYKEVKKDLIIKLPKYSLFELENGRKRMLASAGELQKG  
104 NELALPSKYVNFYLYLASHYEKLGKSPEDNEQKQLFVEQHKHYLDEIIIEQISEFSKRVILADANLKDVL SAYNKHRDK  
105 PIREQAENIIHLFTLTNLGAPAAFKYFDTTIDRKRYTSTKEVLDATLIHQSI TGLYETRIDLSQLGGDKKKKLKL

106

107

108
